# Supplementary material for: Photoluminescent graphene quantum dots for in vitro and in vivo bioimaging using long wavelength emission
Source: Royal Society of Chemistry journal article supplement (doi:10.1039/c5ra02961a), 2015-01-01
Supplement: c5ra02961a1.pdf [file c5ra02961a1.pdf]

## Electronic supplementary information

### **Photoluminescent graphene quantum dots for bioimaging applications**

*Shoujun Zhu,<sup>a</sup> Nan Zhou,<sup>b</sup> Zeyu Hao,<sup>b</sup> Suraj Maharjan,<sup>b</sup> Xiaohuan Zhao,<sup>a</sup> Yubin Song,<sup>a</sup> Bin Sun,<sup>c</sup> Kai Zhang,<sup>a</sup> Junhu Zhang,<sup>a</sup> Hongchen Sun,<sup>c</sup> Laijin Lu,<sup>\*b</sup> Bai Yang<sup>\*a</sup>*

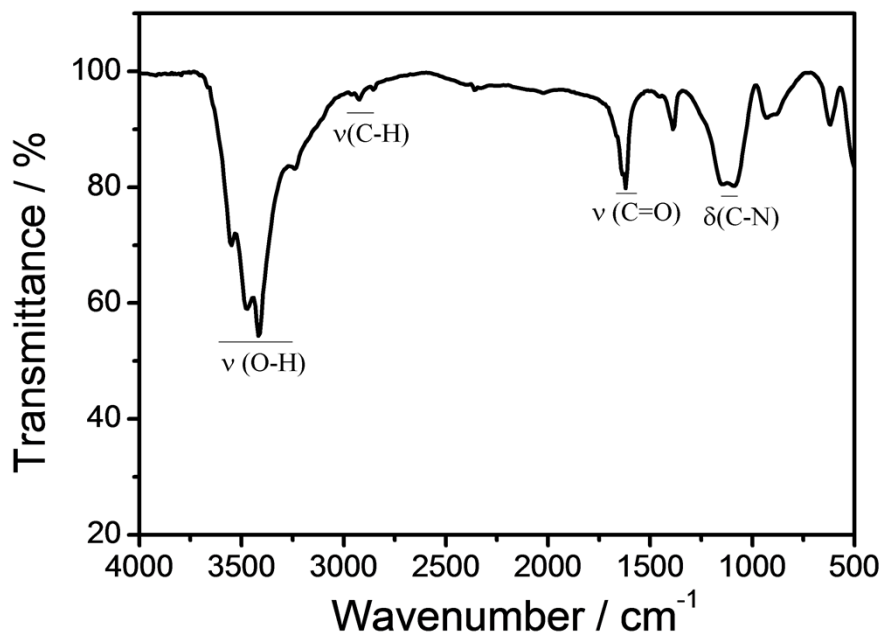

Fig. S1. The FT-IR spectra of GQDs.

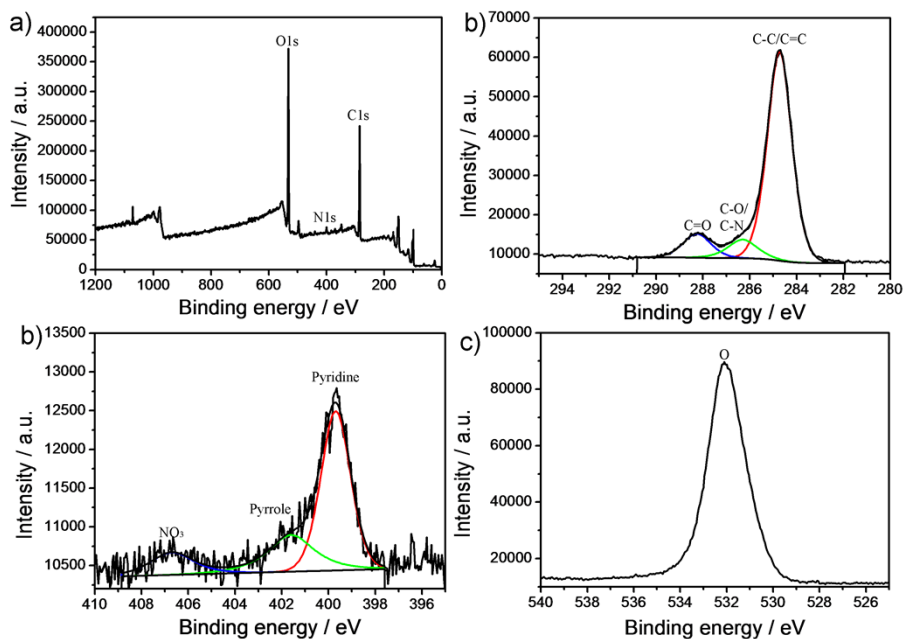

Fig. S2. XPS analysis of GQDs, a) the whole survey; b) C1s survey; c) N1s survey; d) O1s survey.

| Data note:               | C-<br>C/C=C | C-O<br>or<br>C-N | O=C<br>or<br>COOH | Pyridine<br>like N | Pyrrole<br>like N | -NO <sub>2</sub> or -<br>NO <sub>3</sub> | O      |
|--------------------------|-------------|------------------|-------------------|--------------------|-------------------|------------------------------------------|--------|
| Peak Binding Energy / eV | 284.73      | 286.30           | 288.25            | 399.69             | 401.60            | 406.70                                   | 532.09 |
| GQDs (%)                 | 47.64       | 5.27             | 6.28              | 1.26               | 0.51              | 0.28                                     | 38.77  |

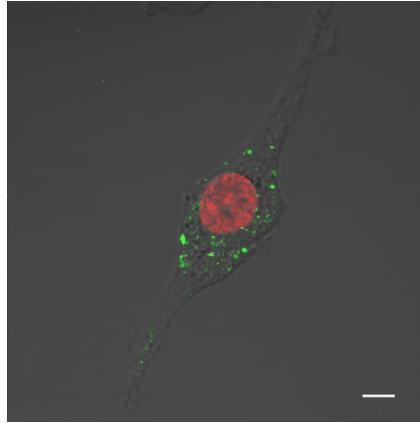

**Fig. S3.** Double labeling by GQDs and PI (nucleus-specific dyes). No absorption of PI on GQDs was observed. The scale bar is 5  $\mu\text{m}$ .

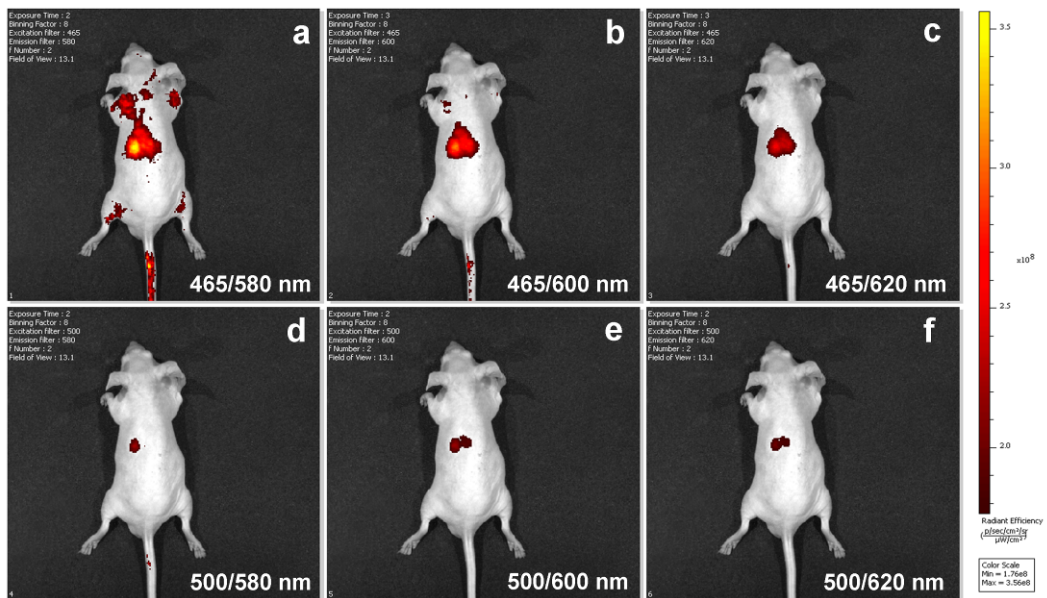

**Fig. S4.** In vivo imaging of GQDs in BALB/C mice at different excitatoin and emission wavelength.
